# Supplementary material
Source: Royal Society of Chemistry journal article supplement (doi:10.1039/d6ta00082g)
Supplement: d6ta00082g1.pdf [file d6ta00082g1.pdf]

# Supplementary Information for: Reimagining Interface Processing in Solid-State Batteries via Electrochemical Flash Sintering

## Authors:

Riku Fukada<sup>a</sup>, Claire V. Colin<sup>a</sup>, Timothée Fabre<sup>b</sup>, Marlu César Steil<sup>b</sup>, Renaud Bouchet<sup>b</sup>, Maria Diaz-Lopez<sup>a\*</sup>

Affiliations :

<sup>a</sup>Institut Néel, CNRS, Université Grenoble-Alpes, CNRS, F-38042 Grenoble, France

<sup>b</sup>Université Grenoble Alpes, Université Savoie Mont Blanc, CNRS, Grenoble INP, LEPMI, 38000 Grenoble, France

\*Email: maria.diaz-lopez@neel.cnrs.fr

## Table of contents:

### Supplementary Figure

|                                                                                                                                                                                                                                                                                                                                                                                       |   |
|---------------------------------------------------------------------------------------------------------------------------------------------------------------------------------------------------------------------------------------------------------------------------------------------------------------------------------------------------------------------------------------|---|
| <b>Figure S1.</b> PDF of the unsintered LAMP precursor (LAMP Ball Milled) and FSED LAMP (LAMP-4A-100kHz) showing the presence of a Ti <sup>3+</sup> -O peak alongside the Ti <sup>4+</sup> /Al <sup>3+</sup> -O, indicating that reduced titanium species are already present before flash sintering.....                                                                             | 3 |
| <b>Figure S2.</b> Cross-section measurement of LVP-7.5A-1kHz: Optical images (left), 1D X-ray diffraction heatmaps across the pellet thickness (center), phase quantification by Rietveld refinement (right). .....                                                                                                                                                                   | 4 |
| <b>Figure S3.</b> Rietveld refinement of the peripheral zone of LVP sintered at 6 A/cm <sup>2</sup> . Preferential orientation was observed for α <sub>1</sub> -LiVOPO <sub>4</sub> and accounted for using a spherical harmonics (4th order) correction. The refinement resulted in R <sub>wp</sub> =8.64% , R <sub>exp</sub> =2.89%, and a goodness-of-fit (GOF) value of 2.99..... | 5 |
| <b>Figure S4.</b> (red) XRD analysis of LVP processed at 800°C under vacuum, changes after extended exposure to ambient atmosphere (black) after leaving under high vacuum for 1 day. ....                                                                                                                                                                                            | 6 |
| <b>Figure S5.</b> Variable temperature X-ray diffraction from RT to 700°C.....                                                                                                                                                                                                                                                                                                        | 7 |
| <b>Figure S6.</b> Rietveld refinement of the composite powder sintered at 800°C under Ar. The refinement resulted in R <sub>wp</sub> =7.04% , R <sub>exp</sub> =2.79%, and a GOF value of 2.53. ....                                                                                                                                                                                  | 8 |
| <b>Figure S7.</b> Composite-6A-1kHz-0s (a) and Composite-6A-1kHz-50s (b) Composite-6A-1kHz-50s was divided into three zones. Rietveld refinement of synchrotron XRD data of the resulting                                                                                                                                                                                             |   |

|                                                                                                                                                                                                                                                                                                                                                                                                                                             |    |
|---------------------------------------------------------------------------------------------------------------------------------------------------------------------------------------------------------------------------------------------------------------------------------------------------------------------------------------------------------------------------------------------------------------------------------------------|----|
| three zones (c) Vertical lines indicate the Bragg position of each phase: (blue) LVP, (pink) LAMP, (brown) LATVP, (green) $\alpha$ -LiVOPO <sub>4</sub> · nH <sub>2</sub> O .....                                                                                                                                                                                                                                                           | 9  |
| <b>Figure S8.</b> Composite-6A-200kHz pellet was divided into three zones. Rietveld refinement of synchrotron XRD data of resulting three zones (Left) Vertical lines indicate the Bragg position of each phase: (blue) AIPO, and (brown) LATVP .....                                                                                                                                                                                       | 10 |
| <b>Figure S9.</b> Overview of the Flash-Sintered ML Pellet. The pellet was sectioned into three parts: densified side (Multi1), less densified (Multi3), and the center part (Multi2).....                                                                                                                                                                                                                                                  | 11 |
| <b>Figure S10.</b> Structural evolution across Multi1 .....                                                                                                                                                                                                                                                                                                                                                                                 | 12 |
| <b>Figure S11.</b> Structural evolution across Multi3. The pellets fractured after the experiment. This image was reconstructed by taping the fragments together. Experimental data were recorded before breakage.....                                                                                                                                                                                                                      | 13 |
| <b>Figure S12.</b> Rietveld Refinement of densified region of ML: Vertical lines indicate the Bragg position of each phase: (pink) LAMP, (brown) LATVP, (green) AIPO <sub>4</sub> , (orange) Li <sub>4</sub> P <sub>2</sub> O <sub>7</sub> , and (purple) $\epsilon$ -LiVOPO <sub>4</sub> .....                                                                                                                                             | 14 |
| <b>Figure S13.</b> High-magnification SEM-BSD images of the sintered multilayer. These images support the densification and structural cohesion of individual LAMP and composite layers discussed in the main text (see Section Monolithic Processing of LVP LAMP LVP Multilayer Architectures). .....                                                                                                                                      | 15 |
| <b>Figure S14.</b> Images of LAMP pellets after flash sintering: LAMP-4A-100kHz (left, Au electrodes) and LAMP-300V-500kHz (right, Pt electrodes).. The observed melting and redistribution of the Au/Pt electrodes, including metallic globules trapped within the ceramic matrix, indicate localized overheating during flash and support the occurrence of temperatures above the melting points of Au (1064 °C) and Pt (1768 °C). ..... | 15 |

## Supplementary Tables

|                                                                                                                                                                                                                                                                                                                                                                                                                                   |    |
|-----------------------------------------------------------------------------------------------------------------------------------------------------------------------------------------------------------------------------------------------------------------------------------------------------------------------------------------------------------------------------------------------------------------------------------|----|
| <b>Table S 1.</b> Experimental parameters and sample acronyms .....                                                                                                                                                                                                                                                                                                                                                               | 16 |
| <b>Table S 2.</b> Summary of refinement parameters of the partially melted zone of LAMP sintered at 500 kHz. Preferential orientation was observed for LAMP and accounted for using a spherical harmonics (6th order) correction. The refinement resulted in $R_{wp}=7.13$ .....                                                                                                                                                  | 17 |
| <b>Table S 3.</b> Summary of refinement parameters.....                                                                                                                                                                                                                                                                                                                                                                           | 18 |
| <b>Table S 4.</b> Refinement Parameters of LATVP model: composition of LATVP was refined by fixing the vanadium composition to 0.384, resulting with estimated composition of Li <sub>2</sub> Al <sub>0.15</sub> V <sub>0.77</sub> Ti <sub>1.08</sub> (PO <sub>4</sub> ) <sub>3</sub> (theoretical composition Li <sub>2.02</sub> Al <sub>0.24</sub> V <sub>0.77</sub> Ti <sub>0.99</sub> (PO <sub>4</sub> ) <sub>3</sub> ) ..... | 19 |
| <b>Table S 5.</b> Summary of Refinement Parameters from Figure 5: Lattice parameter of LAMP and LVP model fixed prior to the refinement.....                                                                                                                                                                                                                                                                                      | 20 |
| <b>Table S 6.</b> Summary of Refinement Parameters from Figure S7 .....                                                                                                                                                                                                                                                                                                                                                           | 21 |
| <b>Table S 7.</b> Summary of Refinement Parameters from Figure S8 .....                                                                                                                                                                                                                                                                                                                                                           | 22 |
| <b>Table S 8.</b> Summary of Refinement Parameters from Figure S12. ....                                                                                                                                                                                                                                                                                                                                                          | 23 |

Supplementary Figures

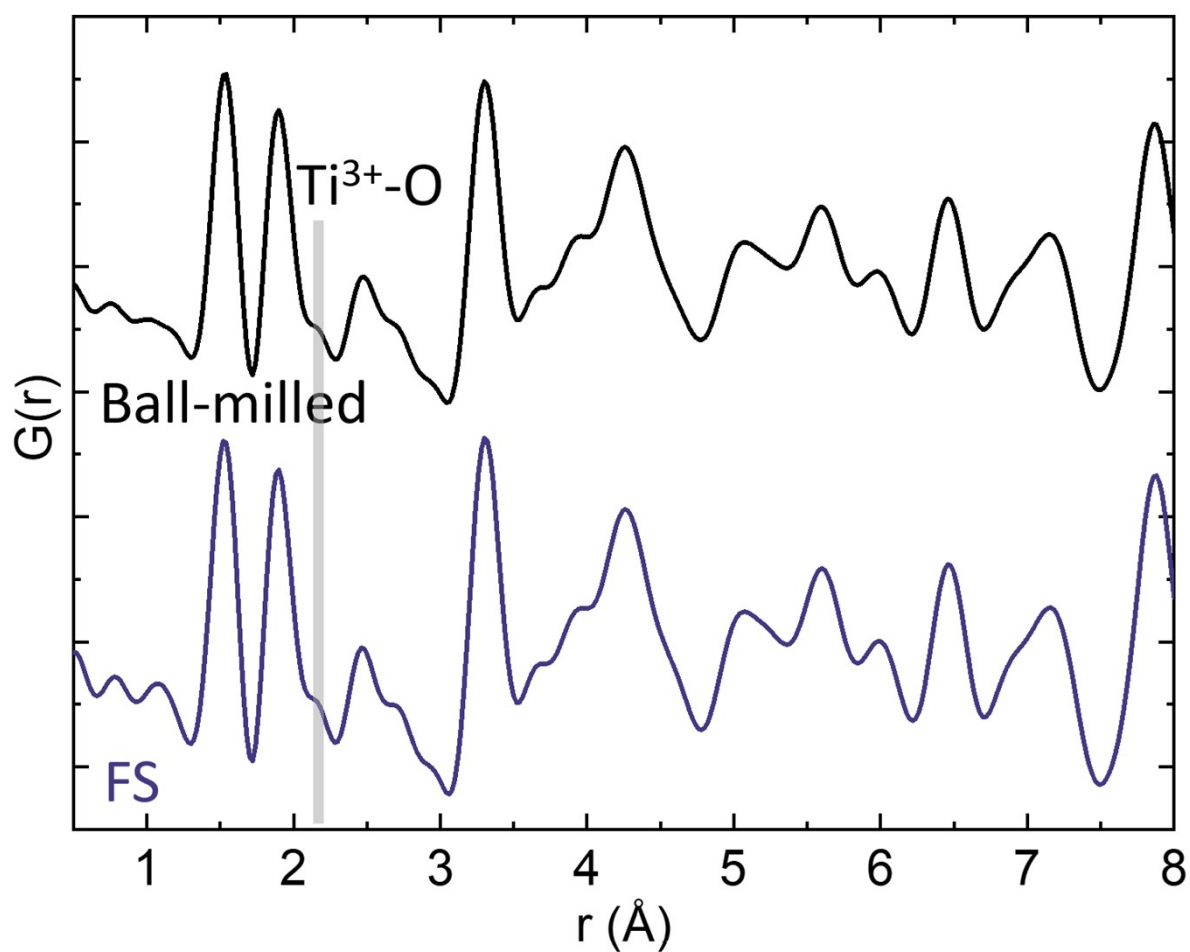

**Figure S1.** PDF of the unsintered LATP precursor (LATP Ball Milled) and FSed LATP (LATP-4A-100kHz) showing the presence of a  $\text{Ti}^{3+}\text{-O}$  peak alongside the  $\text{Ti}^{4+}/\text{Al}^{3+}\text{-O}$ , indicating that reduced titanium species are already present before flash sintering.

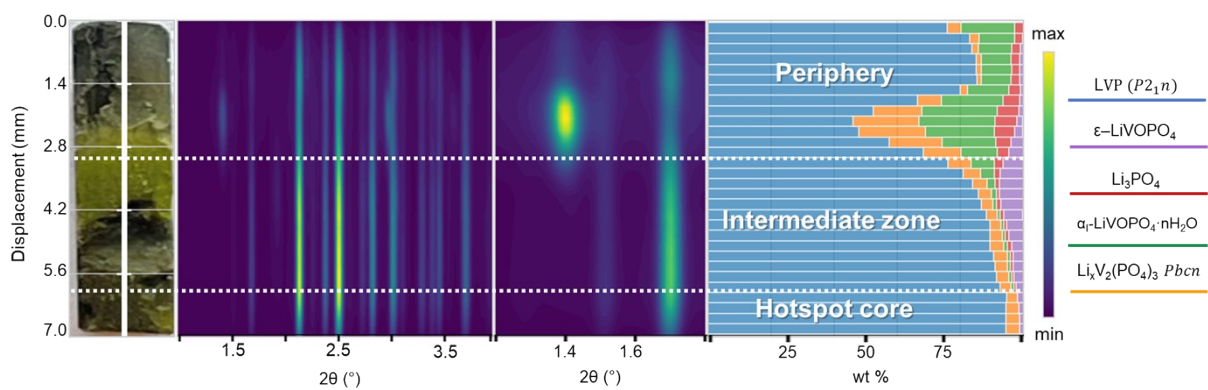

**Figure S2.** Cross-section measurement of LVP-7.5A-1kHz: Optical images (left), 1D X-ray diffraction heatmaps across the pellet thickness (center), phase quantification by Rietveld refinement (right).

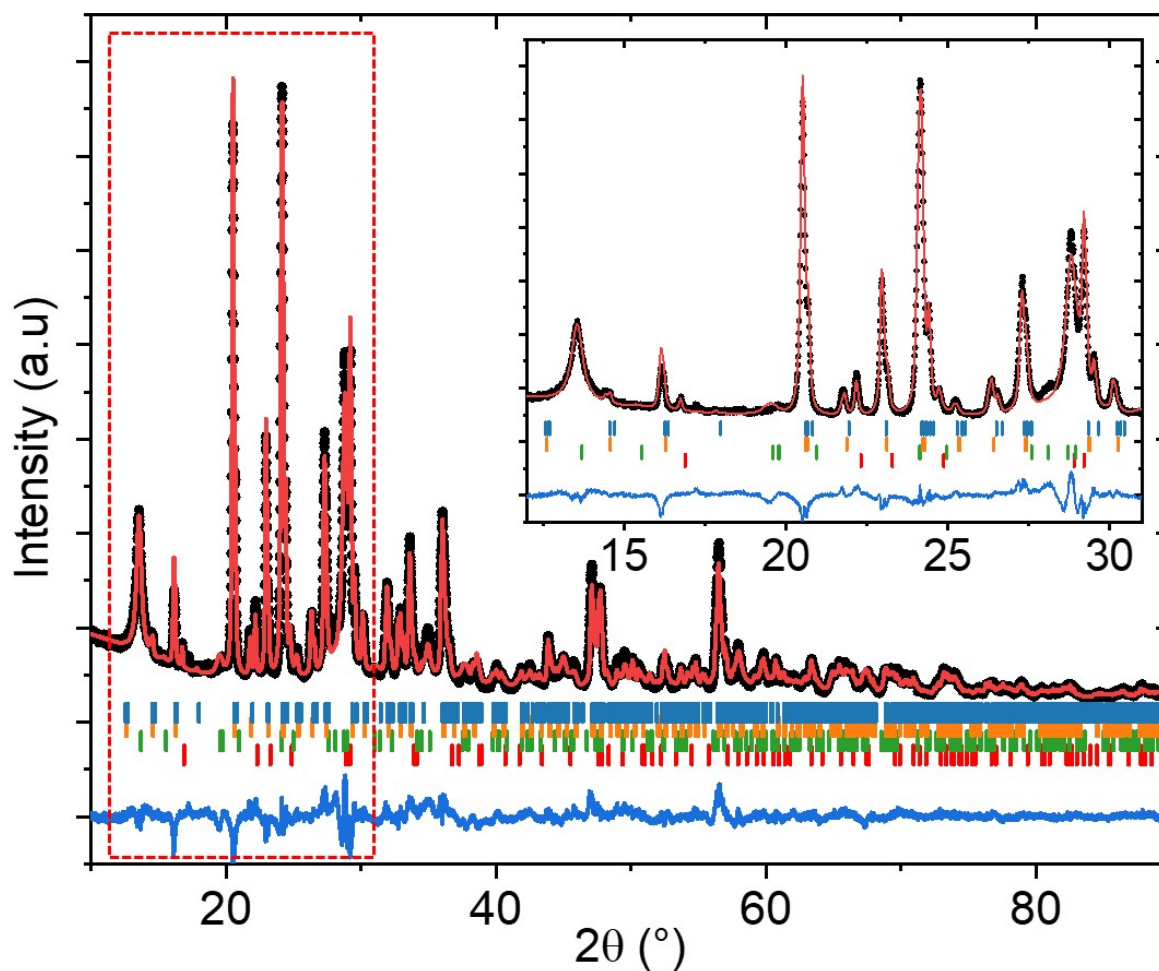

**Figure S3.** Rietveld refinement of the peripheral zone of LVP sintered at 6 A/cm<sup>2</sup>. Preferential orientation was observed for  $\alpha_1$ -LiVOPO<sub>4</sub> and accounted for using a spherical harmonics (4th order) correction. The refinement resulted in  $R_{wp}$ =8.64% ,  $R_{exp}$ =2.89%, and a goodness-of-fit (GOF) value of 2.99.

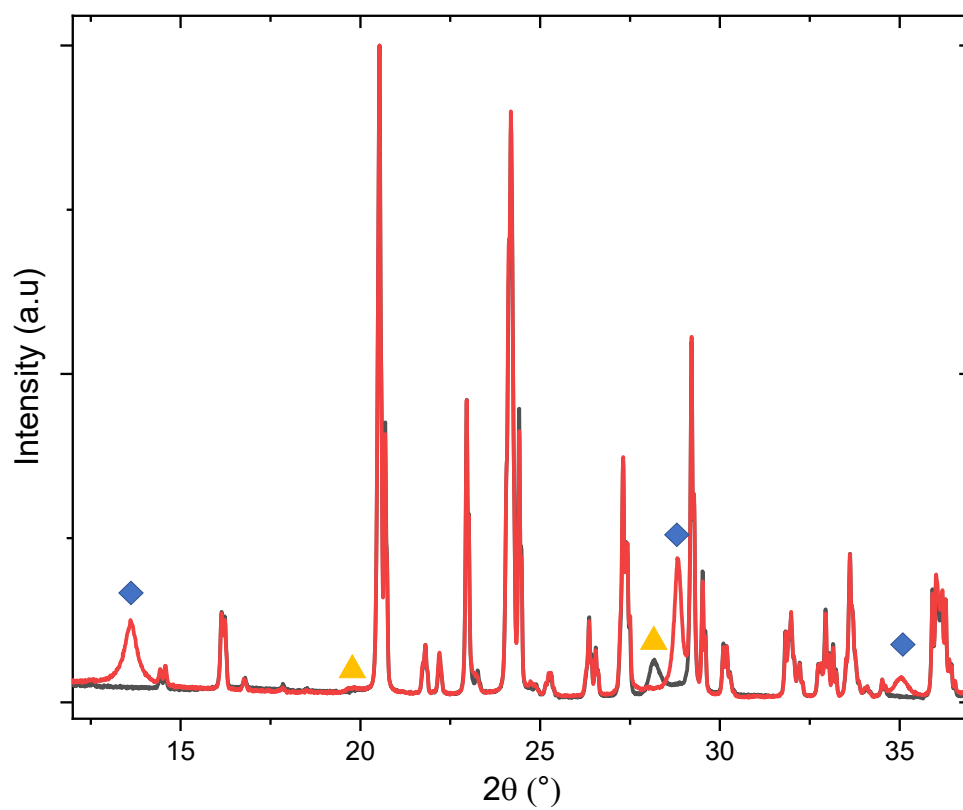

**Figure S4.** (red) XRD analysis of LVP processed at 800°C under vacuum, changes after extended exposure to ambient atmosphere (black) after leaving under high vacuum for 1 day.

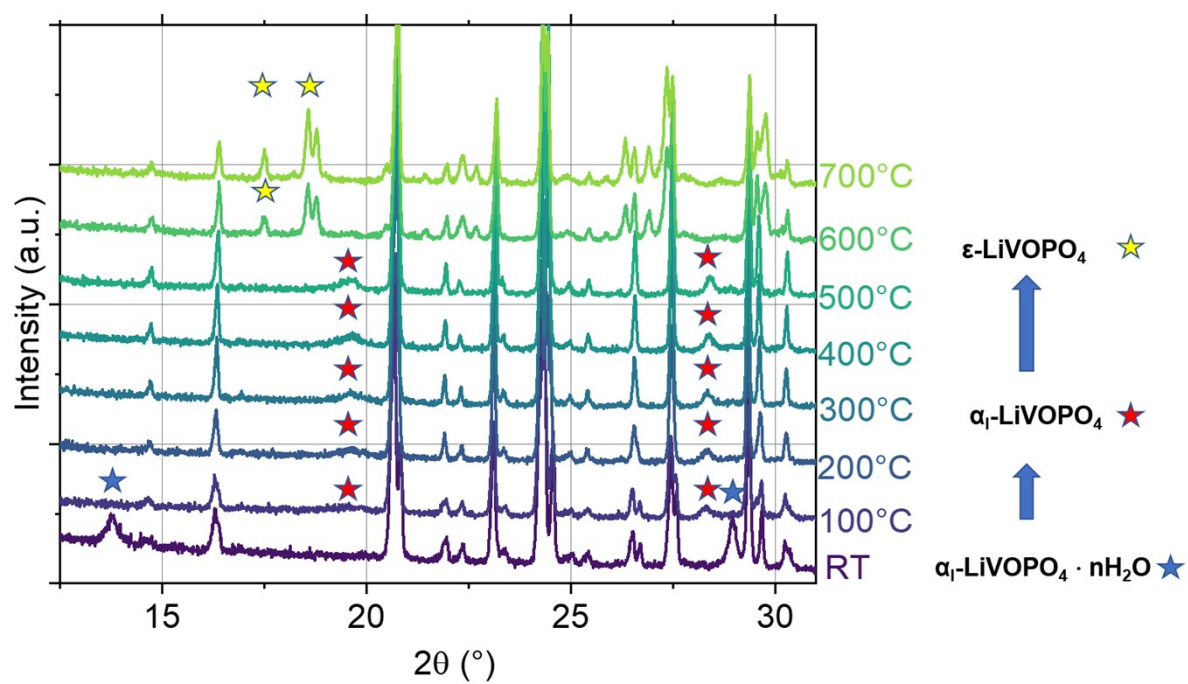

**Figure S5.** Variable temperature X-ray diffraction from RT to 700°C.

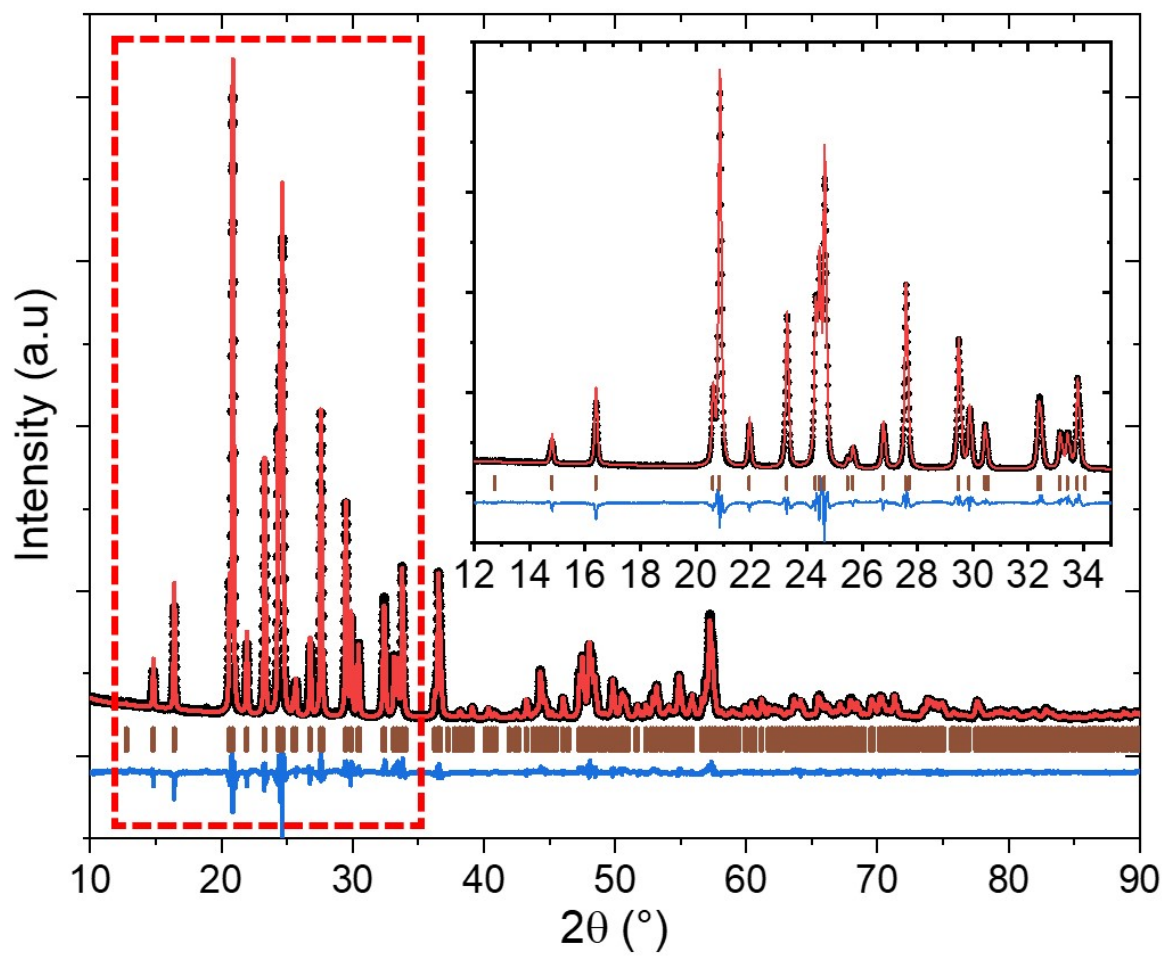

**Figure S6.** Rietveld refinement of the composite powder sintered at 800°C under Ar. The refinement resulted in  $R_{wp}=7.04\%$  ,  $R_{exp}=2.79\%$ , and a GOF value of 2.53.

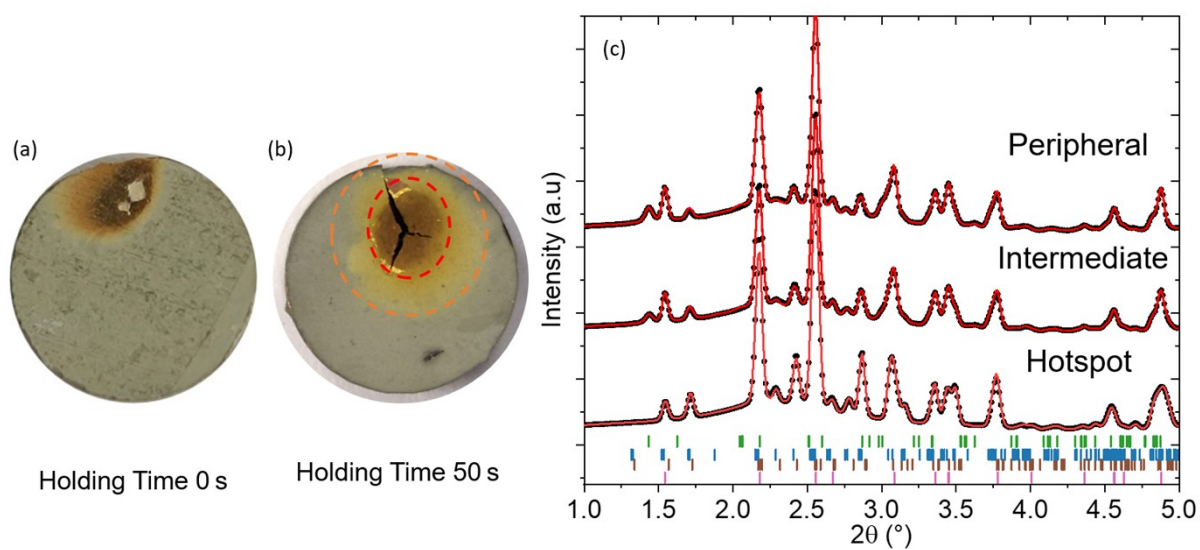

**Figure S7.** Composite-6A-1kHz-0s (a) and Composite-6A-1kHz-50s (b) Composite-6A-1kHz-50s was divided into three zones. Rietveld refinement of synchrotron XRD data of the resulting three zones (c) Vertical lines indicate the Bragg position of each phase: (blue) LVP, (pink) LATP, (brown) LATVP, (green)  $\alpha_1$ -LiVOPO<sub>4</sub> · nH<sub>2</sub>O

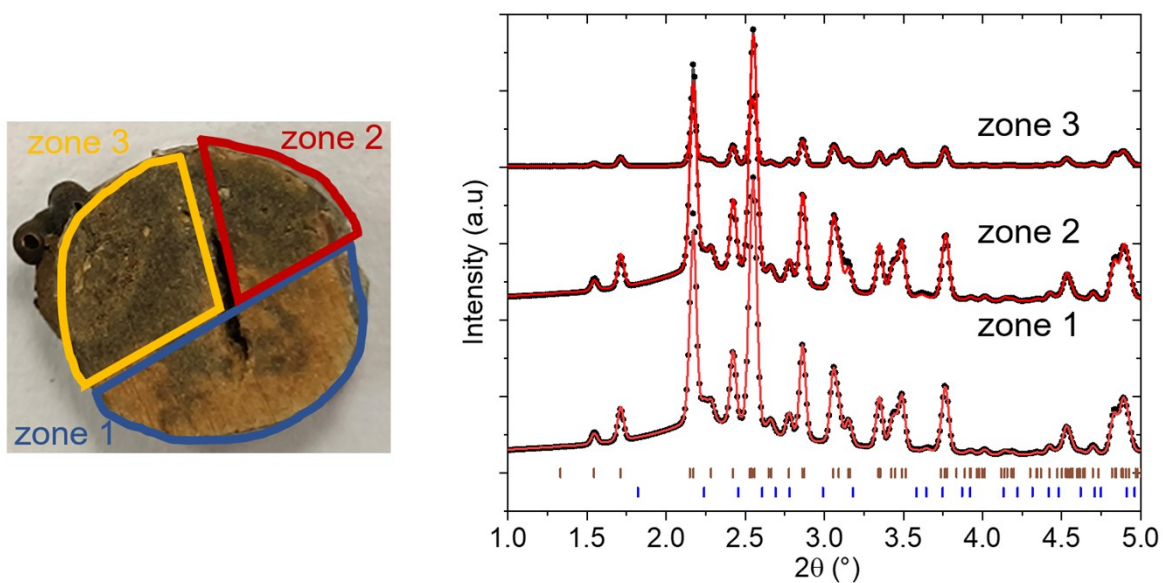

**Figure S8.** Composite-6A-200kHz pellet was divided into three zones. Rietveld refinement of synchrotron XRD data of resulting three zones (Left) Vertical lines indicate the Bragg position of each phase: (blue) AIPO, and (brown) LATVP

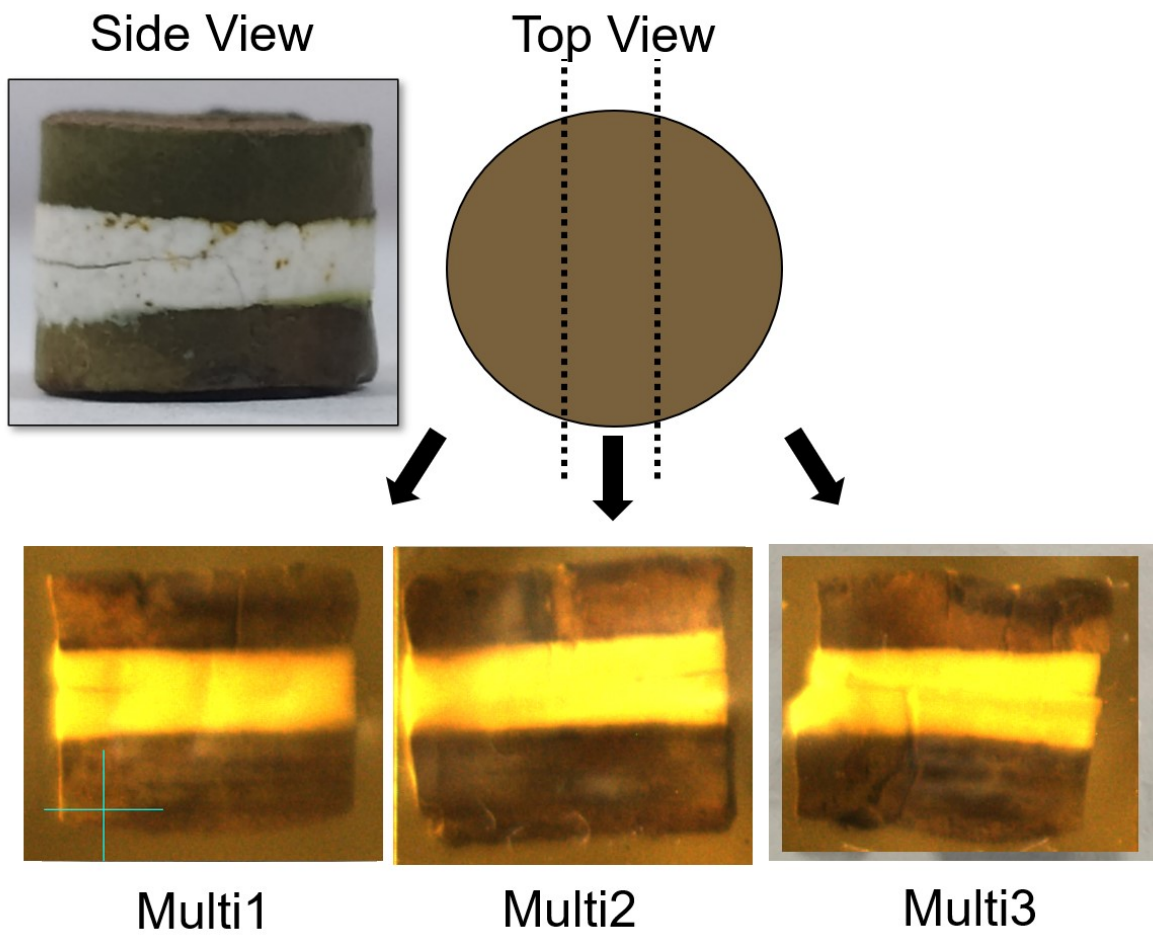

**Figure S9.** Overview of the Flash-Sintered ML Pellet. The pellet was sectioned into three parts: densified side (Multi1), less densified (Multi3), and the center part (Multi2).

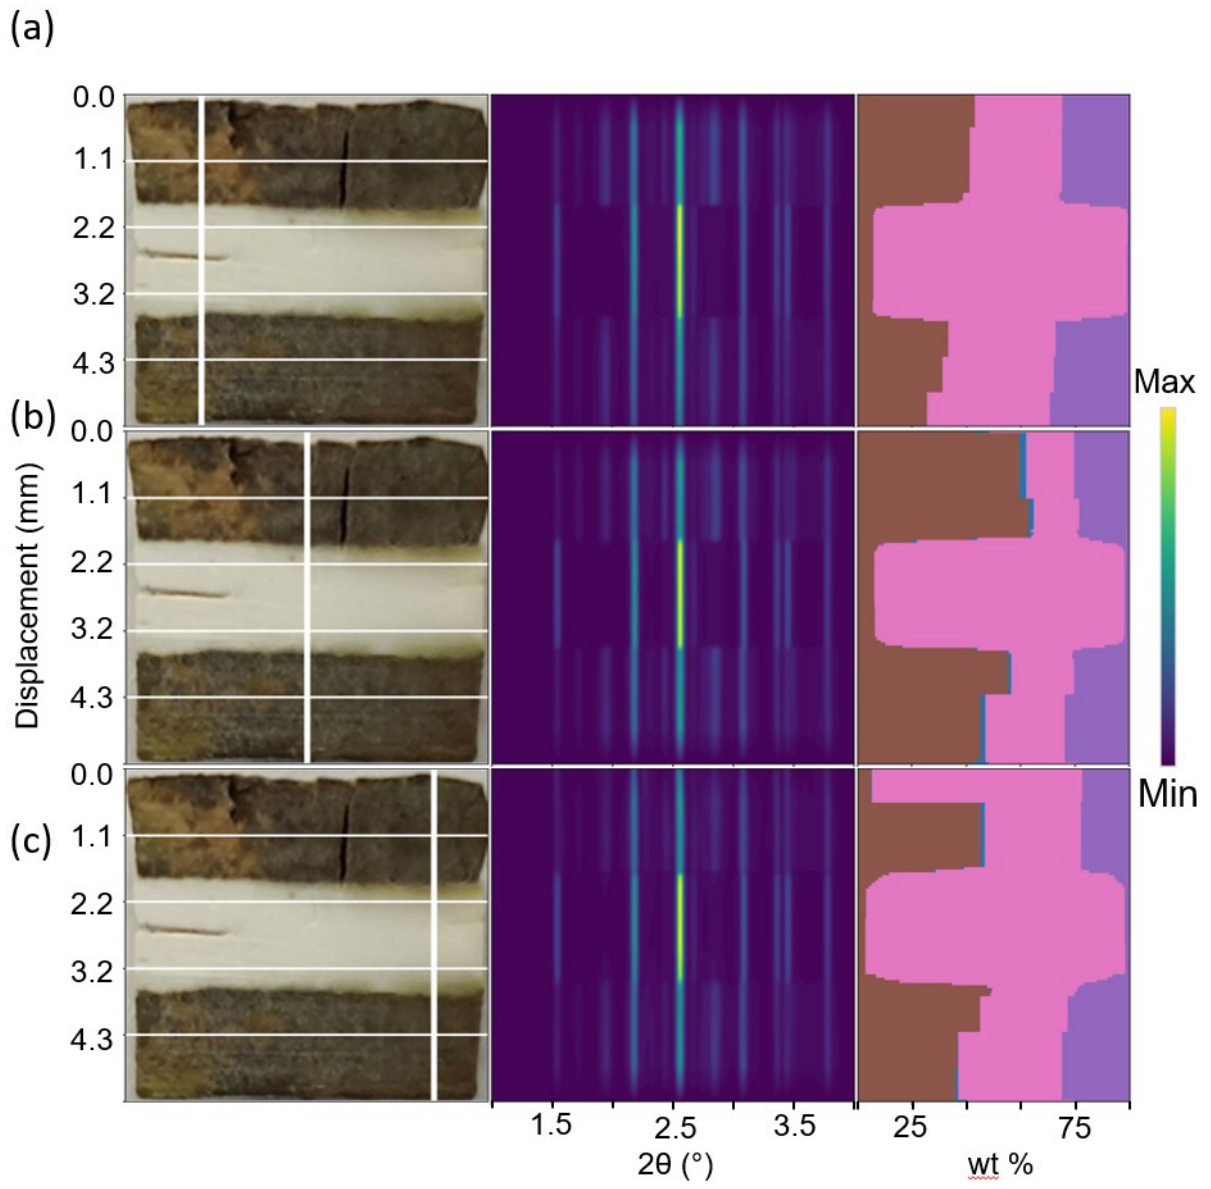

**Figure S10.** Structural evolution across Multi1

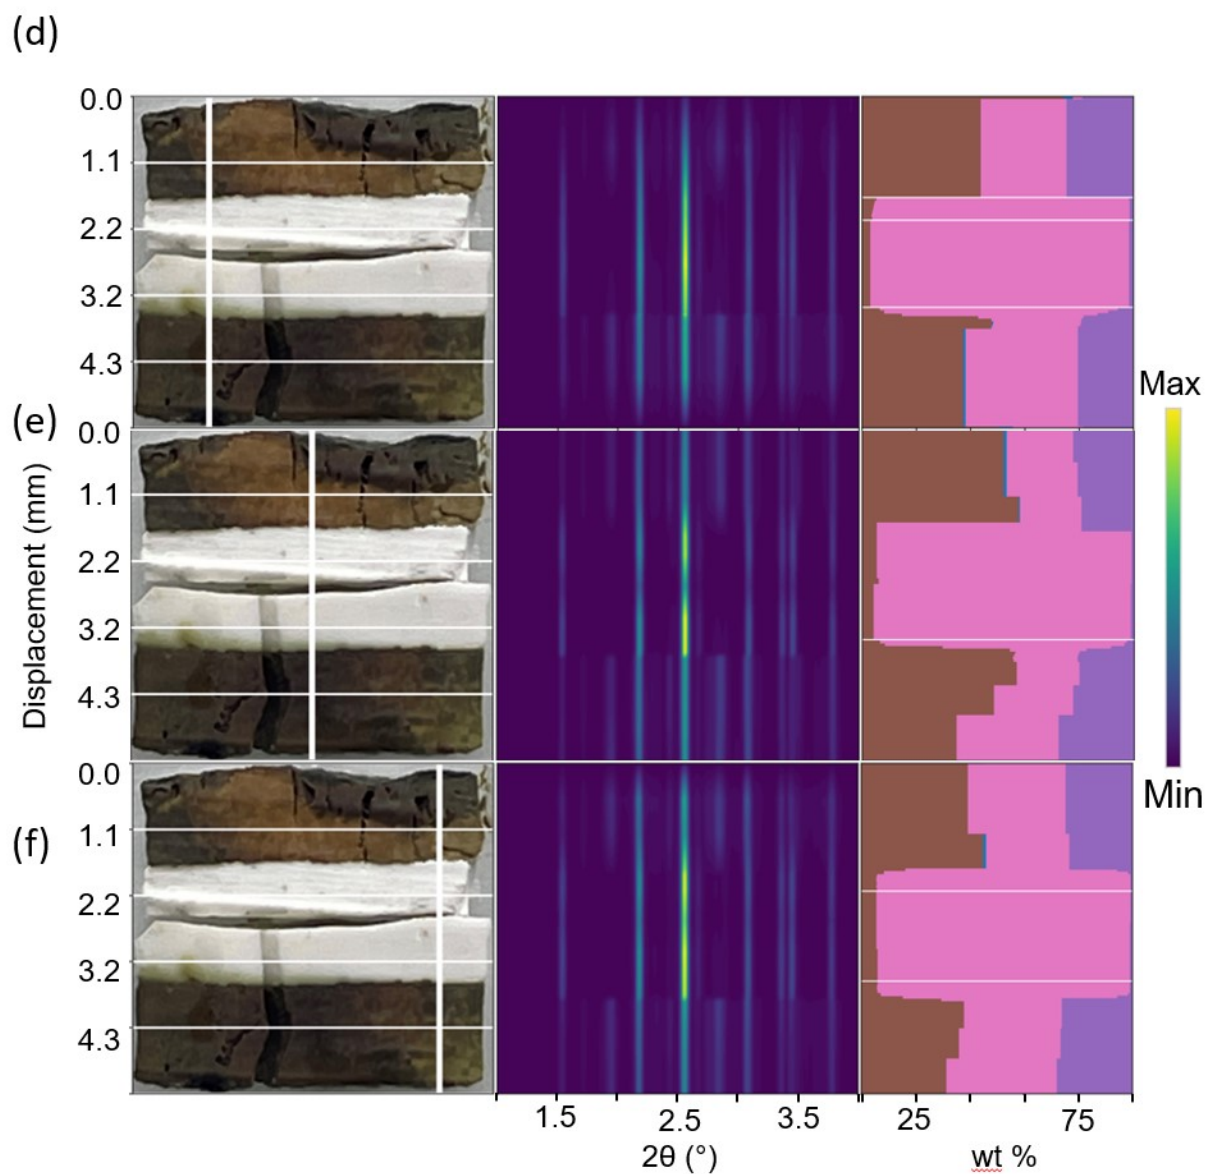

**Figure S11.** Structural evolution across Multi3. The pellets fractured after the experiment. This image was reconstructed by taping the fragments together. Experimental data were recorded before breakage.

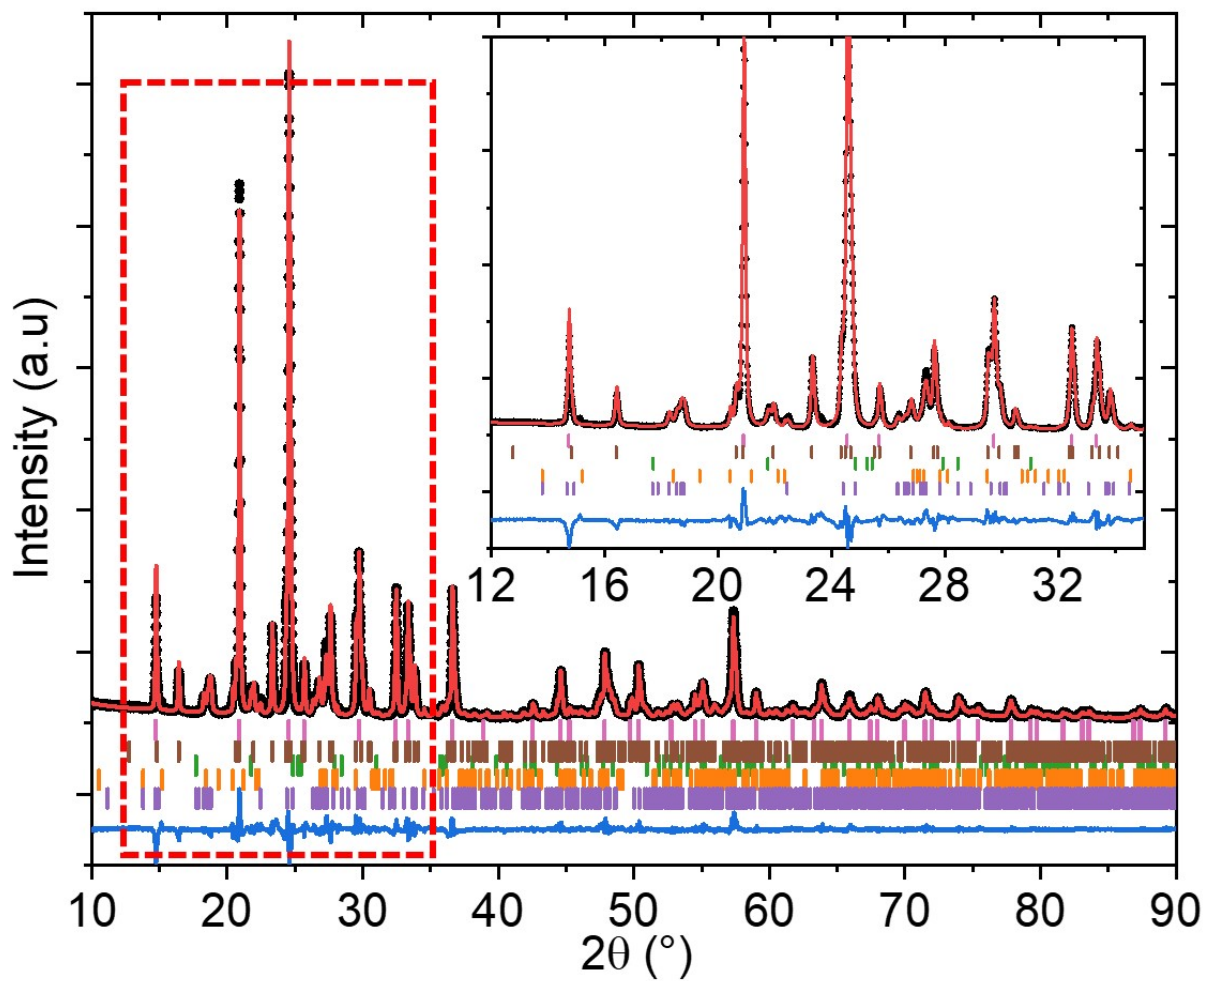

**Figure S12.** Rietveld Refinement of densified region of ML: Vertical lines indicate the Bragg position of each phase: (pink) LTP, (brown) LATVP, (green) AlPO<sub>4</sub>, (orange) Li<sub>4</sub>P<sub>2</sub>O<sub>7</sub>, and (purple) ε-LiVOPO<sub>4</sub>

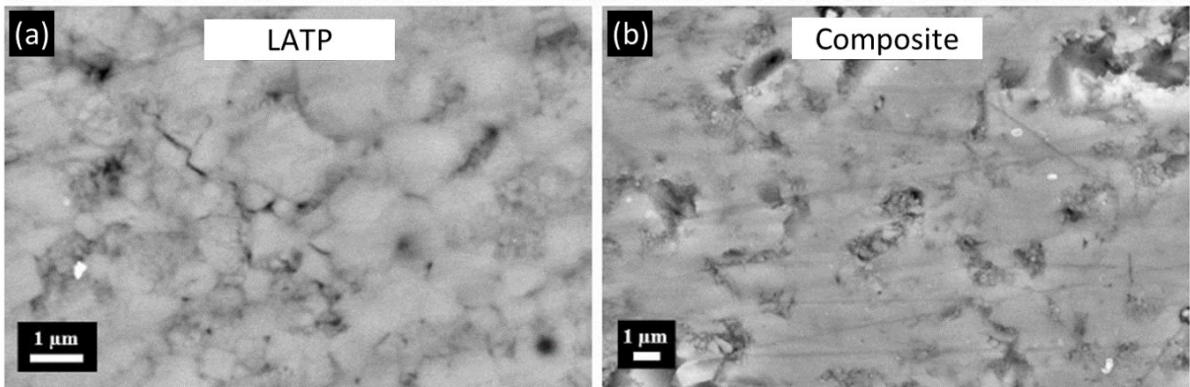

**Figure S13.** High-magnification SEM-BSD images of the sintered multilayer. These images support the densification and structural cohesion of individual LATP and composite layers discussed in the main text (see Section Monolithic Processing of LVP|LATP|LVP Multilayer Architectures).

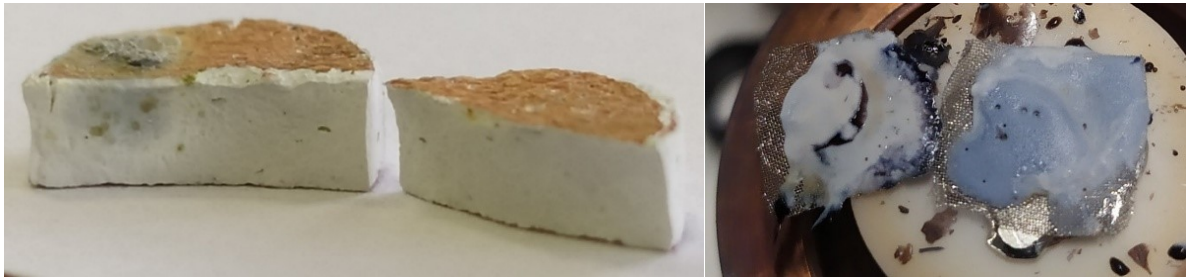

**Figure S14.** Images of LATP pellets after flash sintering: LATP-4A-100kHz (left, Au electrodes) and LATP-300V-500kHz (right, Pt electrodes).. The observed melting and redistribution of the Au/Pt electrodes, including metallic globules trapped within the ceramic matrix, indicate localized overheating during flash and support the occurrence of temperatures above the melting points of Au (1064 °C) and Pt (1768 °C).

## Supplementary Tables

**Table S 1.** Experimental parameters and sample acronyms

| Sample ID                  | Composition                | Applied V (V/cm)                                   | Incubation T (°C) | Frequency (kHz) | Applied I (A/cm <sup>2</sup> ) | Hold t (s) |
|----------------------------|----------------------------|----------------------------------------------------|-------------------|-----------------|--------------------------------|------------|
| LVP Ball Milled            | LVP                        | LVP Ball-milled powder                             |                   |                 |                                |            |
| LVP-CS-Ar                  | LVP                        | Conventionally sintered pellet under Ar (980°C 3h) |                   |                 |                                |            |
| LVP-FS                     | LVP                        | 100                                                | 300               | 1               | 6                              | 25         |
| LVP-CS-Ar+3%H <sub>2</sub> | LVP                        | Conventionally sintered under Ar+3%H <sub>2</sub>  |                   |                 |                                |            |
| LVP-2A-1kHz                | LVP                        | 100                                                | 300               | 1               | 2                              | 50         |
| LVP-6A-1kHz                | LVP                        | 100                                                | 300               | 1               | 6                              | 50         |
| LVP-9A-1kHz                | LVP                        | 100                                                | 300               | 1               | 9                              | 5          |
| LVP-6A-100kHz              | LVP                        | 100                                                | 300               | 100             | 6                              | 50         |
| LVP-7.5A-1kHz              | LVP                        | 100                                                | 300               | 1               | 7.5                            | 50         |
| LATP Ball Milled           | LATP                       | LATP Ball-milled powder                            |                   |                 |                                |            |
| LATP-CS-Air                | LATP                       | Conventionally sintered pellet under air (1000°C)  |                   |                 |                                |            |
| LATP-4A-100kHz             | LATP                       | 200                                                | 250               | 100             | 4                              | 20         |
| LATP-300V-500kHz           | LATP                       | 300                                                | 370               | 500             | 3                              | 27         |
| Composite Ball Milled      | LATP:LVP (6:4)             | LATP:LVP-Ball Milled (BM)                          |                   |                 |                                |            |
| Composite CS               | LATP:LVP (6:4)             | Conventionally sintered pellet under Ar (800°C 3h) |                   |                 |                                |            |
|                            |                            | Conventionally sintered pellet under Ar (750°C 3h) |                   |                 |                                |            |
|                            |                            | Conventionally sintered pellet under Ar (700°C 3h) |                   |                 |                                |            |
| Composite-6A-1kHz-50s      | LATP:LVP (6:4)             | 100                                                | 300               | 1               | 6                              | 50         |
| Composite-6A-1kHz-0s       | LATP:LVP (6:4)             | 100                                                | 300               | 1               | 6                              | 0          |
| Composite-6A-300kHz        | LATP:LVP (6:4)             | 100                                                | 300               | 300             | $I_{set} = 6$<br>$I_{exp} = 3$ | 50         |
| Composite-6A-200kHz        | LATP:LVP (6:4)             | 100                                                | 300               | 200             | 6                              | 50         |
| Composite-6A-100kHz        | LATP:LVP (6:4)             | 100                                                | 300               | 100             | 6                              | 50         |
| Multilayer                 | LVP-LATP   LATP   LVP-LATP | 200                                                | 485               | 1               | 6                              | 50         |

**Table S 2.** Summary of refinement parameters of the partially melted zone of LATP sintered at 500 kHz. Preferential orientation was observed for LATP and accounted for using a spherical harmonics (6th order) correction. The refinement resulted in  $R_{wp}=7.13$

| Phase                    | $\text{Li}_{1.4}\text{Al}_{0.4}\text{Ti}_{1.6}(\text{PO}_4)_3$ | $\text{AlPO}_4$ | $\text{LiTiOPO}_4$ | $\text{Li}_3\text{PO}_4$ |
|--------------------------|----------------------------------------------------------------|-----------------|--------------------|--------------------------|
| a (Å)                    | 6.81(2)                                                        | 8.5006(14)      | 6.1172             | 7.37(2)                  |
| b (Å)                    | 7.57(2)                                                        | 8.5006(14)      | 5.2503             | 6.421(17)                |
| c (Å)                    | 7.210(17)                                                      | 20.887(5)       | 4.8955             | 7.22(3)                  |
| $\alpha$ (°)             | 90                                                             | 90              | 90                 | 90                       |
| $\beta$ (°)              | 90                                                             | 90              | 90                 | 90                       |
| $\gamma$ (°)             | 90                                                             | 120             | 90                 | 90                       |
| Volume (Å <sup>3</sup> ) | 372.0(19)                                                      | 1307.1(5)       | 157.23             | 342(2)                   |
| Space Group              | C2221                                                          | R-3c            | Pmn21              | Pnma                     |
| Weight %                 | 88.77                                                          | 6.27            | 2.88               | 2.08                     |

**Table S 3.** Summary of refinement parameters.

| Phase                    | $a_1$ -LiVOPO <sub>4</sub><br>nH <sub>2</sub> O | Li <sub>3</sub> PO <sub>4</sub> | Li <sub>3</sub> V <sub>2</sub> (PO <sub>4</sub> ) <sub>3</sub> -<br>gamma phase | Li <sub>3</sub> V <sub>2</sub> (PO <sub>4</sub> ) <sub>3</sub> |
|--------------------------|-------------------------------------------------|---------------------------------|---------------------------------------------------------------------------------|----------------------------------------------------------------|
| a (Å)                    | 8.984(2)                                        | 6.1172(12)                      | 12.1547(10)                                                                     | 8.6145(5)                                                      |
| b (Å)                    | 8.982(2)                                        | 5.2503(9)                       | 8.5983(7)                                                                       | 8.5975(5)                                                      |
| c (Å)                    | 12.932(2)                                       | 4.8956(8)                       | 8.6259(7)                                                                       | 12.0468(6)                                                     |
| α (°)                    | 90                                              | 90                              | 90                                                                              | 90                                                             |
| β (°)                    | 90                                              | 90                              | 90                                                                              | 90.585(4)                                                      |
| γ (°)                    | 90                                              | 90                              | 90                                                                              | 90                                                             |
| Volume (Å <sup>3</sup> ) | 1043.5(4)                                       | 157.23(5)                       | 901.49(13)                                                                      | 892.18(8)                                                      |
| Space Group              | Cmca                                            | Pmn21                           | Pbcn                                                                            | P21/n                                                          |
| Weight %                 | 25.1                                            | 7.25                            | 28.41                                                                           | 39.24                                                          |

**Table S 4.** Refinement Parameters of LATVP model: composition of LATVP was refined by fixing the vanadium composition to 0.384, resulting with estimated composition of  $\text{Li}_2\text{Al}_{0.15}\text{V}_{0.77}\text{Ti}_{1.08}(\text{PO}_4)_3$  (theoretical composition  $\text{Li}_{2.02}\text{Al}_{0.24}\text{V}_{0.77}\text{Ti}_{0.99}(\text{PO}_4)_3$ )

| Label | Element | Multiplicity | Frac_X      | Frac_Y      | Frac_Z      | Occupancy | B_iso   |
|-------|---------|--------------|-------------|-------------|-------------|-----------|---------|
| Li_1  | Li      | 8            | 0.285       | 0.270       | 0.317       | 1         | 4       |
| V_1   | V+3     | 8            | 0.25427(19) | 0.46464(10) | 0.11225(8)  | 0.384     | 0.38(3) |
| Ti_1  | Ti+4    | 8            | 0.25427(19) | 0.46464(10) | 0.11225(8)  | 0.542(6)  | 0.38(3) |
| Al_1  | Al+3    | 8            | 0.25427(19) | 0.46464(10) | 0.11225(8)  | 0.074(6)  | 0.38(3) |
| P_1   | P       | 8            | 0.1049(2)   | 0.10866(19) | 0.14685(14) | 1         | 0.55(4) |
| P_2   | P       | 4            | 0.0367(3)   | 0.25        | 0.5         | 1         | 0.55(4) |
| O_1   | O       | 8            | 0.4227(4)   | 0.1051(4)   | 0.3458(3)   | 1         | 0.20(4) |
| O_2   | O       | 8            | 0.3253(4)   | 0.4858(4)   | 0.2696(3)   | 1         | 0.20(4) |
| O_3   | O       | 8            | 0.1591(4)   | 0.0564(4)   | 0.0296(3)   | 1         | 0.20(4) |
| O_4   | O       | 8            | 0.4383(3)   | 0.3604(3)   | 0.0716(2)   | 1         | 0.20(4) |
| O_5   | O       | 8            | 0.1454(4)   | 0.1624(4)   | 0.4186(2)   | 1         | 0.20(4) |
| O_6   | O       | 8            | 0.1605(4)   | 0.2742(4)   | 0.1785(3)   | 1         | 0.20(4) |

**Table S 5.** Summary of Refinement Parameters from Figure 5: Lattice parameter of LATP and LVP model fixed prior to the refinement

| Phase                    | $\text{Li}_{1.4}\text{Al}_{0.4}\text{Ti}_{1.6}(\text{PO}_4)_3$ | $\text{Li}_2(\text{Al,Ti,V})_2(\text{PO}_4)_3$ | $\text{Li}_3\text{V}_2(\text{PO}_4)_3$ |
|--------------------------|----------------------------------------------------------------|------------------------------------------------|----------------------------------------|
| a (Å)                    | 8.497                                                          | 8.5111(3)                                      | 8.616                                  |
| b (Å)                    | 8.497                                                          | 8.5979(3)                                      | 8.599                                  |
| c (Å)                    | 20.78                                                          | 11.9424(3)                                     | 12.05                                  |
| $\alpha$ (°)             | 90                                                             | 90                                             | 90                                     |
| $\beta$ (°)              | 90                                                             | 90                                             | 90.6                                   |
| $\gamma$ (°)             | 120                                                            | 90                                             | 90                                     |
| Volume (Å <sup>3</sup> ) | 1300                                                           | 873.92(5)                                      | 892.7                                  |
| Space Group              | R-3c                                                           | Pbna                                           | P21/n                                  |
| Weight % (30°C)          | 58.28                                                          | 0                                              | 41.72                                  |
| Weight % (700°C)         | 4.14                                                           | 86.82                                          | 9.04                                   |
| Weight % (750°C)         | 0.73                                                           | 98.61                                          | 0.66                                   |
| Weight % (800°C)         | 0                                                              | 100                                            | 0                                      |

**Table S 6.** Summary of Refinement Parameters from Figure S7

| Phase                         | $a_1\text{-LiVOPO}_4$<br>$n\text{H}_2\text{O}$ | $\text{Li}_{1.4}\text{Al}_{0.4}\text{Ti}_{1.6}(\text{PO}_4)_3$ | $\text{Li}_2(\text{Al,Ti,V})_2(\text{PO}_4)_3$ | $\text{Li}_3\text{V}_2(\text{PO}_4)_3$ |
|-------------------------------|------------------------------------------------|----------------------------------------------------------------|------------------------------------------------|----------------------------------------|
| a (Å)                         | 9.004(9)                                       | 8.4968(3)                                                      | 8.4982(14)                                     | 8.6097(8)                              |
| b (Å)                         | 8.974(8)                                       | 8.4968(3)                                                      | 8.5790(14)                                     | 8.6012(7)                              |
| c (Å)                         | 12.913(6)                                      | 20.7948(11)                                                    | 11.9064(17)                                    | 12.0437(13)                            |
| $\alpha$ (°)                  | 90                                             | 90                                                             | 90                                             | 90                                     |
| $\beta$ (°)                   | 90                                             | 90                                                             | 90                                             | 90.494(10)                             |
| $\gamma$ (°)                  | 90                                             | 120                                                            | 90                                             | 90                                     |
| Volume (Å <sup>3</sup> )      | 1043.3(14)                                     | 1300.17(11)                                                    | 868.1(2)                                       | 891.85(15)                             |
| Space Group                   | Cmca                                           | R-3c                                                           | Pbna                                           | P21/n                                  |
| Weight %<br>(Hotspot<br>core) | 0                                              | 14.71                                                          | 62.29                                          | 23.00                                  |
| Weight %<br>(Intermediate)    | 5.36                                           | 43.26                                                          | 17.43                                          | 33.96                                  |
| Weight %<br>(Peripheral)      | 9.08                                           | 51.67                                                          | 6.22                                           | 33.03                                  |

**Table S 7.** Summary of Refinement Parameters from Figure S8

| Phase                    | AlPO <sub>4</sub> | Li <sub>2</sub> (Al,Ti,V) <sub>2</sub> (PO <sub>4</sub> ) <sub>3</sub> |
|--------------------------|-------------------|------------------------------------------------------------------------|
| a (Å)                    | 6.883(8)          | 8.5369(3)                                                              |
| b (Å)                    | 7.546(10)         | 8.6179(3)                                                              |
| c (Å)                    | 7.106(6)          | 11.9892(4)                                                             |
| α (°)                    | 90                | 90                                                                     |
| β (°)                    | 90                | 90                                                                     |
| γ (°)                    | 90                | 90                                                                     |
| Volume (Å <sup>3</sup> ) | 369.1(7)          | 882.05(5)                                                              |
| Space Group              | C2221             | Pbna                                                                   |
| Weight % (zone 1)        | 2.12              | 97.88                                                                  |
| Weight % (zone 2)        | 1.76              | 98.24                                                                  |
| Weight % (zone 3)        | 2.45              | 97.55                                                                  |

**Table S 8.** Summary of Refinement Parameters from Figure S12.

| Phase                    | AlPO <sub>4</sub> | LATP        | Li <sub>2</sub> (Al,Ti,V) <sub>2</sub> (PO <sub>4</sub> ) <sub>3</sub> | ε-LiVOPO <sub>4</sub> | Li <sub>4</sub> P <sub>2</sub> O <sub>7</sub> | LVP    |
|--------------------------|-------------------|-------------|------------------------------------------------------------------------|-----------------------|-----------------------------------------------|--------|
| a (Å)                    | 7.164(10)         | 8.49942(15) | 8.5107(3)                                                              | 8.6442(12)            | 6.7671(9)                                     | 8.6056 |
| b (Å)                    | 7.000(9)          | 8.49942(15) | 8.6059(3)                                                              | 7.1002(8)             | 7.1937(6)                                     | 8.5917 |
| c (Å)                    | 7.050(6)          | 20.8080(6)  | 11.9437(4)                                                             | 5.1901(5)             | 7.9223(9)                                     | 12.037 |
| α (°)                    | 90                | 90          | 90                                                                     | 111.44                | 89.950(9)                                     | 90     |
| β (°)                    | 90                | 90          | 90                                                                     | 89.986                | 91.223(8)                                     | 90.609 |
| γ (°)                    | 90                | 120         | 90                                                                     | 103.07                | 116.957(11)                                   | 90     |
| Volume (Å <sup>3</sup> ) | 353.6(7)          | 1301.78(6)  | 874.78(5)                                                              | 287.63(6)             | 343.66(7)                                     | 889.93 |
| Space Group              | C2221             | R-3c        | Pbna                                                                   | P-1                   | P-1                                           | P21/n  |
| Weight %                 | 1.4               | 39.16       | 46.02                                                                  | 12.23                 | 1.19                                          | 0      |
